# Supplementary material for: Comprehensive analysis of the m6A-related molecular patterns and diagnostic biomarkers in osteoporosis
Source: PubMed Central journal article supplement (PMC9399504; doi:10.3389/fendo.2022.957742), 2022-08-10
Supplement: Presentation_1.pdf [file Presentation_1.pdf]

**Figure S1 Consensus clustering analysis of the 40 low-BMD women based on the expression of 13 DE-m6A regulators.**

(A)-(F) The consensus clustering matrix for  $k = 2-6$ .

(G) The cumulative distribution function (CDF) of consensus clustering for  $k$  from 2 to 6.

(H) Relative change in area under the CDF curve for  $k$  from 2 to 6.

(I) The tracking plot presented to verify the principal component for  $k$  from 2 to 6.

**Figure S2 Construction of the WGCNA.**

(A) Clustering dendrogram of samples with trait heatmap.

(B) Detection of the scale-free index for various soft-threshold powers ( $\beta$ ). Left panel, X-axis represented a function of soft-threshold power, and Y-axis represented the scale-free fit index. Right panel, X-axis represented a function of soft-threshold power, and Y-axis represented the mean connectivity (degree).

(C) Eigengene dendrogram of samples.

(D) Dendrogram of the genes based on the measurement of dissimilarity (1-TOM).
